# Supplementary material
Source: publisher figshare collection journal article supplement (https://frontiersin.figshare.com/ndownloader/files/22477253)
Supplement: Supplementary file [file 22477253]

## SUPPLEMENTAL MATERIAL

| Table of contents                                                                                                                                                                              | Page |
|------------------------------------------------------------------------------------------------------------------------------------------------------------------------------------------------|------|
| <b>1. Supplemental Tables</b>                                                                                                                                                                  |      |
| 1.1 - Supplemental Table 1. Gene expression assays used in qPCR reactions in the validation study                                                                                              | 2    |
| 1.2 - Supplemental Table 2. Clinical characteristics of the patients selected for the transcriptomics study                                                                                    | 3    |
| 1.3 - Supplemental Table 3: Quality control data for the RNA sequencing protocol                                                                                                               | 4    |
| 1.4 - Supplemental Table 4: Genes differentially expressed between type 1 diabetes patients classified as decliners or non-decliners                                                           | 5    |
| <b>2. Supplemental Figures</b>                                                                                                                                                                 |      |
| 2.1 - Supplemental Figure 1. Estimated glomerular filtration rate (eGFR) evolution of the type 1 diabetes patients selected for the transcriptomics study.                                     | 11   |
| 2.2 - Supplemental Figure 2. Four genes differentially expressed in non-diabetic controls and type 1 diabetes (T1D) patients classified as non-decliners or decliners.                         | 12   |
| 2.3 - Supplemental Figure 3. Eight genes differentially expressed between type 1 diabetes (T1D) patients classified as non-decliners or decliners without adjustment for possible confounders. | 13   |

## 1. Supplemental Tables

**Supplemental Table 1.** Gene expression assays used in qPCR reactions in the validation study

| Gene            | Assay ID      |
|-----------------|---------------|
| <i>CYP4F22</i>  | Hs00403446_m1 |
| <i>SLC6A3</i>   | Hs00997374_m1 |
| <i>PKD2L1</i>   | Hs00175850_m1 |
| <i>MAP1LC3C</i> | Hs01374916_m1 |
| <i>PMP22</i>    | Hs00165556_m1 |
| <i>CDH6</i>     | Hs01026780_m1 |
| <i>HS3ST2</i>   | Hs00428644_m1 |
| <i>PCDHGB2</i>  | Hs00251715_m1 |
| <i>LYPD3</i>    | Hs01012111_m1 |
| <i>GPNMB</i>    | Hs01095669_m1 |

**Supplemental Table 2.** Demographic and clinical characteristics of the patients selected for the transcriptomics study

| Sample                      | Sex    | Age<br>(years) | T1D duration<br>(years) | Follow-up<br>time (years) | Initial<br>eGFR | Final<br>eGFR | Urinary ACR<br>(mg/g creatinine) |
|-----------------------------|--------|----------------|-------------------------|---------------------------|-----------------|---------------|----------------------------------|
| Non-Decliner #1             | Female | 38             | 25                      | 4                         | 22              | 21            | > 300                            |
| Non-Decliner #2             | Male   | 48             | 21                      | 13                        | 114             | 78            | > 300                            |
| Non-Decliner #3             | Male   | 50             | 33                      | 12                        | 100             | 68            | 30 - 300                         |
| Decliner #1                 | Male   | 25             | 16                      | 1.1                       | 51              | 19            | > 300                            |
| Decliner #2                 | Male   | 43             | 17                      | 4.1                       | 39              | 11            | > 300                            |
| Control #1                  | Female | 27             | -                       | -                         | -               | -             | -                                |
| Control #2                  | Female | 33             | -                       | -                         | -               | -             | -                                |
| Decliner #3<br>EXCLUDED     | Male   | 22             | 17                      | 2.2                       | 84              | 40            | > 300                            |
| Decliner #4<br>EXCLUDED     | Female | 38             | 21                      | 2.2                       | 75              | 58            | < 30                             |
| Non-Decliner #4<br>EXCLUDED | Female | 30             | 29                      | 2.1                       | 77              | 75            | 30-300                           |

T1D – type 1 diabetes mellitus, eGFR – estimated glomerular filtration rate, ACR – albumin to creatinine ratio

**Supplemental Table 3:** Quality control data for the RNA sequencing protocol

| Sample                      | Total Purity<br>Filtered Reads<br>Sequenced | Intragenic<br>Rate | Exonic<br>Rate | Intronic<br>Rate | Intergenic<br>Rate | Expression<br>Profiling<br>Efficiency | rRNA rate | Transcripts<br>Detected | Genes<br>Detected |
|-----------------------------|---------------------------------------------|--------------------|----------------|------------------|--------------------|---------------------------------------|-----------|-------------------------|-------------------|
| Non Decliner #1             | 30,685,504                                  | 0.921              | 0.679          | 0.242            | 0.079              | 0.513                                 | 0.270     | 113.956                 | 20.350            |
| Non Decliner #2             | 23,036,704                                  | 0.959              | 0.854          | 0.106            | 0.040              | 0.798                                 | 0.550     | 122.887                 | 20.222            |
| Non Decliner #3             | 26,619,646                                  | 0.959              | 0.884          | 0.075            | 0.041              | 0.800                                 | 0.611     | 118.099                 | 19.379            |
| Decliner #1                 | 28,245,426                                  | 0.955              | 0.828          | 0.126            | 0.045              | 0.750                                 | 0.523     | 123.784                 | 20.620            |
| Decliner #2                 | 27,612,472                                  | 0.899              | 0.689          | 0.210            | 0.101              | 0.617                                 | 0.359     | 131.370                 | 23.791            |
| Control #1                  | 23,726,786                                  | 0.975              | 0.886          | 0.088            | 0.025              | 0.705                                 | 0.490     | 96.053                  | 16.514            |
| Control #2                  | 28,446,024                                  | 0.856              | 0.621          | 0.235            | 0.144              | 0.471                                 | 0.137     | 95.953                  | 19.565            |
| Decliner #3<br>EXCLUDED     | 43,560,166                                  | 0.866              | 0.482          | 0.384            | 0.134              | 0.019                                 | 0.004     | 39.638                  | 7.865             |
| Decliner #4<br>EXCLUDED     | 45,602,716                                  | 0.943              | 0.718          | 0.225            | 0.057              | 0.018                                 | 0.010     | 34.475                  | 7.121             |
| Non Decliner #4<br>EXCLUDED | 21,894,600                                  | 0.897              | 0.583          | 0.313            | 0.103              | 0.025                                 | 0.013     | 28.545                  | 6.311             |

**Supplemental Table 4:** Genes differentially expressed between type 1 diabetes patients classified as decliners or non-decliners

| Ensembl Gene ID | Gene symbol         | Description                                                                                     | logFC Decliner vs Non Decliner | P value    |
|-----------------|---------------------|-------------------------------------------------------------------------------------------------|--------------------------------|------------|
| ENSG00000108839 | <i>ALOX12</i>       | arachidonate 12-lipoxygenase                                                                    | -4.4503612                     | 0.03447863 |
| ENSG00000143631 | <i>FLG</i>          | filaggrin                                                                                       | -4.215108                      | 0.02672097 |
| ENSG00000096006 | <i>CRISP3</i>       | cysteine-rich secretory protein 3                                                               | -4.140766                      | 0.01333841 |
| ENSG00000171954 | <i>CYP4F22</i>      | cytochrome P450, family 4, subfamily F, polypeptide 22                                          | -3.7858359                     | 0.00025082 |
| ENSG00000189051 | <i>RNF222</i>       | ring finger protein 222                                                                         | -3.4979911                     | 0.03168788 |
| ENSG00000120875 | <i>DUSP4</i>        | dual specificity phosphatase 4                                                                  | -3.4446505                     | 0.02038495 |
| ENSG00000143369 | <i>ECM1</i>         | extracellular matrix protein 1                                                                  | -3.3885416                     | 0.02911073 |
| ENSG00000105388 | <i>CEACAM5</i>      | carcinoembryonic antigen-related cell adhesion molecule 5                                       | -3.3339863                     | 0.01972394 |
| ENSG00000182580 | <i>EPHB3</i>        | EPH receptor B3                                                                                 | -3.2007149                     | 0.00590593 |
| ENSG00000137699 | <i>TRIM29</i>       | tripartite motif containing 29                                                                  | -3.1524998                     | 0.04179578 |
| ENSG00000086548 | <i>CEACAM6</i>      | carcinoembryonic antigen-related cell adhesion molecule 6 (non-specific cross reacting antigen) | -3.1350229                     | 0.02055993 |
| ENSG00000118322 | <i>ATP10B</i>       | ATPase, class V, type 10B                                                                       | -3.1118423                     | 0.02359864 |
| ENSG00000170477 | <i>KRT4</i>         | keratin 4, type II                                                                              | -3.1107406                     | 0.02322718 |
| ENSG00000131203 | <i>IDO1</i>         | indoleamine 2,3-dioxygenase 1                                                                   | -3.0951427                     | 0.00597051 |
| ENSG00000197632 | <i>SERPINB2</i>     | serpin peptidase inhibitor, clade B (ovalbumin), member 2                                       | -3.0510793                     | 0.03641305 |
| ENSG00000236740 | <i>RP4-569M23.5</i> |                                                                                                 | -3.0153701                     | 0.04489003 |
| ENSG00000215182 | <i>DPF1</i>         | mucin 5AC, oligomeric mucus/gel-forming                                                         | -3.0047343                     | 0.04843816 |
| ENSG00000101447 | <i>FAM83D</i>       | family with sequence similarity 83, member D                                                    | -2.9375554                     | 0.01545214 |
| ENSG00000214797 | <i>MT-TN</i>        |                                                                                                 | -2.9039336                     | 0.04730699 |
| ENSG00000171124 | <i>FUT3</i>         | fucosyltransferase 3 (galactoside 3(4)-L-fucosyltransferase, Lewis blood group)                 | -2.8708475                     | 0.03349962 |
| ENSG00000188505 | <i>NCCRP1</i>       | non-specific cytotoxic cell receptor protein 1 homolog (zebrafish)                              | -2.8565349                     | 0.03812747 |

|                 |                      |                                                                  |            |            |
|-----------------|----------------------|------------------------------------------------------------------|------------|------------|
| ENSG00000204616 | <i>TRIM31</i>        | tripartite motif containing 31                                   | -2.7803335 | 0.01931803 |
| ENSG00000101210 | <i>EEF1A2</i>        | eukaryotic translation elongation factor 1 alpha 2               | -2.6953415 | 0.02769259 |
| ENSG00000142319 | <i>SLC6A3</i>        | solute carrier family 6 (neurotransmitter transporter), member 3 | -2.6732127 | 0.00297193 |
| ENSG00000204323 | <i>SFN</i>           | small integral membrane protein 5                                | -2.6619541 | 0.04871884 |
| ENSG00000124466 | <i>LYPD3</i>         | LY6/PLAUR domain containing 3                                    | -2.6286411 | 0.00920701 |
| ENSG00000019102 | <i>SLC22A23</i>      | V-set and immunoglobulin domain containing 2                     | -2.6100731 | 0.04624827 |
| ENSG00000183734 | <i>AL592188.10</i>   | achaete-scute family bHLH transcription factor 2                 | -2.5920706 | 0.04907318 |
| ENSG00000165795 | <i>NDRG2</i>         | NDRG family member 2                                             | -2.5909555 | 0.03584161 |
| ENSG00000128422 | <i>KRT17</i>         | keratin 17, type I                                               | -2.5468915 | 0.02993782 |
| ENSG00000142623 | <i>PADI1</i>         | peptidyl arginine deiminase, type I                              | -2.521159  | 0.01950412 |
| ENSG00000210135 | <i>RP3-331H24.7</i>  | mitochondrially encoded tRNA asparagine                          | -2.4919277 | 0.04732415 |
| ENSG00000227038 | <i>AF127936.5</i>    | general transcription factor Ili pseudogene 7                    | -2.4811682 | 0.04911474 |
| ENSG00000102243 | <i>ASCL2</i>         | vestigial-like family member 1                                   | -2.4510206 | 0.04907087 |
| ENSG00000109255 | <i>RP11-849F2.7</i>  | neuromedin U 7859                                                | -2.4480336 | 0.04941337 |
| ENSG00000198574 | <i>NMU</i>           | SH2 domain containing 1B                                         | -2.4137434 | 0.04929458 |
| ENSG00000274455 | <i>AC009948.5</i>    |                                                                  | -2.3905471 | 0.04668567 |
| ENSG00000145063 | <i>RP11-823E8.3</i>  |                                                                  | -2.3905471 | 0.0497801  |
| ENSG00000175315 | <i>CST6</i>          | cystatin E/M                                                     | -2.3671854 | 0.04149025 |
| ENSG00000077279 | <i>DCX</i>           | doublecortin                                                     | -2.3032249 | 0.0299757  |
| ENSG00000074181 | <i>NOTCH3</i>        | notch 3                                                          | -2.2772756 | 0.01306347 |
| ENSG00000102359 | <i>RP11-346J10.2</i> | sushi-repeat containing protein, X-linked 2                      | -2.2723448 | 0.04655307 |
| ENSG00000261504 | <i>CAPN13</i>        |                                                                  | -2.2696904 | 0.04753423 |
| ENSG00000174514 | <i>MFSD4</i>         | major facilitator superfamily domain containing 4                | -2.2564485 | 0.04285755 |
| ENSG00000105668 | <i>UPK1A</i>         | uroplakin 1A                                                     | -2.2448276 | 0.01557396 |
| ENSG00000263809 | <i>SFRP4</i>         |                                                                  | -2.2413941 | 0.04947078 |
| ENSG00000272574 | <i>RP11-434B12.1</i> |                                                                  | -2.2203495 | 0.04978771 |
| ENSG00000168398 | <i>BDKRB2</i>        | bradykinin receptor B2                                           | -2.2166129 | 0.02527613 |
| ENSG00000156453 | <i>RP11-640L9.1</i>  | protocadherin 1                                                  | -2.2119969 | 0.04889008 |
| ENSG00000228126 | <i>FALEC</i>         | focally amplified long non-coding RNA in epithelial cancer       | -2.1989025 | 0.04089908 |

|                 |                      |                                                             |            |            |
|-----------------|----------------------|-------------------------------------------------------------|------------|------------|
| ENSG00000278354 | <i>GTF2IP7</i>       |                                                             | -2.19476   | 0.04908102 |
| ENSG00000101276 | <i>SLC52A3</i>       | solute carrier family 52 (riboflavin transporter), member 3 | -2.1647636 | 0.03701933 |
| ENSG00000252481 | <i>TSPAN18</i>       | small Cajal body-specific RNA 13                            | -2.1340452 | 0.0468328  |
| ENSG00000025423 | <i>HSD17B6</i>       | hydroxysteroid (17-beta) dehydrogenase 6                    | -2.1263867 | 0.01686704 |
| ENSG00000172818 | <i>OVOL1</i>         | ovo-like zinc finger 1                                      | -2.1198837 | 0.03091257 |
| ENSG00000242741 | <i>RP11-680B3.2</i>  |                                                             | -2.1078814 | 0.0491918  |
| ENSG00000240521 | <i>SMG6-IT1</i>      |                                                             | -2.1078814 | 0.0491918  |
| ENSG00000278941 | <i>CYP4B1</i>        | SMG6 intronic transcript 1                                  | -2.1078814 | 0.0491918  |
| ENSG00000174327 | <i>EID2B</i>         | solute carrier family 16, member 13                         | -2.0974789 | 0.0498405  |
| ENSG00000140835 | <i>CHST4</i>         | carbohydrate (N-acetylglucosamine 6-O) sulfotransferase 4   | -2.0893762 | 0.01124261 |
| ENSG00000171476 | <i>HOPX</i>          | HOP homeobox                                                | -2.0830769 | 0.02736497 |
| ENSG00000275374 | <i>ABHD17AP1</i>     |                                                             | -2.0035591 | 0.04664816 |
| ENSG00000198658 | <i>CTD-2012B7.1</i>  | abhydrolase domain containing 17A pseudogene 1              | -2.0035591 | 0.04664816 |
| ENSG00000105193 | <i>SLC16A13</i>      | ribosomal protein S16                                       | -1.9323843 | 0.04982315 |
| ENSG00000188372 | <i>ZP3</i>           | zona pellucida glycoprotein 3 (sperm receptor)              | -1.9301273 | 0.01614032 |
| ENSG00000246526 | <i>SRPX2</i>         |                                                             | -1.8854066 | 0.04646648 |
| ENSG00000281491 | <i>RP11-674N23.4</i> | DNAJB5 antisense RNA 1 (head to head)                       | -1.8827024 | 0.04882609 |
| ENSG00000186834 | <i>HEXIM1</i>        | hexamethylene bis-acetamide inducible 1                     | -1.8767237 | 0.03474821 |
| ENSG00000267598 | <i>MUC5AC</i>        |                                                             | -1.8622262 | 0.04802259 |
| ENSG00000279727 | <i>ZSCAN23</i>       |                                                             | -1.843721  | 0.04889926 |
| ENSG00000269416 | <i>SCG3</i>          | long intergenic non-protein coding RNA 1224                 | -1.8359009 | 0.04866399 |
| ENSG00000274021 | <i>RP11-359K18.4</i> |                                                             | -1.8323906 | 0.04978705 |
| ENSG00000170426 | <i>FRG1JP</i>        | short chain dehydrogenase/reductase family 9C, member 7     | -1.8252158 | 0.04854333 |
| ENSG00000214814 | <i>FER1L6</i>        | fer-1-like family member 6                                  | -1.8183546 | 0.02259699 |
| ENSG00000131620 | <i>ANO1</i>          | anoctamin 1, calcium activated chloride channel             | -1.775734  | 0.03580051 |
| ENSG00000162998 | <i>FRZB</i>          | frizzled-related protein                                    | -1.7598748 | 0.04041998 |
| ENSG00000162949 | <i>ARL10</i>         | calpain 13                                                  | -1.7397321 | 0.04762765 |
| ENSG00000151715 | <i>TMEM45B</i>       | transmembrane protein 45B                                   | -1.639473  | 0.03906328 |
| ENSG00000013016 | <i>EHD3</i>          | EH-domain containing 3                                      | -1.625314  | 0.04086461 |

|                 |                       |                                                       |            |            |
|-----------------|-----------------------|-------------------------------------------------------|------------|------------|
| ENSG00000196872 | <i>CREB5</i>          | KIAA1211-like                                         | -1.6019891 | 0.04775302 |
| ENSG00000231674 | <i>SLC25A24</i>       | long intergenic non-protein coding RNA 410            | -1.5980658 | 0.04344484 |
| ENSG00000267197 | <i>LRRC39</i>         |                                                       | -1.5980658 | 0.04440034 |
| ENSG00000185352 | <i>RP11-20B7.1</i>    | heparan sulfate 6-O-sulfotransferase 3                | -1.5902457 | 0.04918476 |
| ENSG00000175793 | <i>AGPS</i>           | stratifin                                             | -1.5754469 | 0.0487429  |
| ENSG00000142973 | <i>ITGAD</i>          | cytochrome P450, family 4, subfamily B, polypeptide 1 | -1.5138524 | 0.0491994  |
| ENSG00000187987 | <i>RBL1</i>           | zinc finger and SCAN domain containing 23             | 1.50382052 | 0.04902441 |
| ENSG00000080007 | <i>RP11-10O17.3</i>   | DEAD (Asp-Glu-Ala-Asp) box polypeptide 43             | 1.50819184 | 0.04968186 |
| ENSG00000204802 | <i>GLRB</i>           |                                                       | 1.51097515 | 0.04704692 |
| ENSG00000227671 | <i>SDR9C7</i>         |                                                       | 1.52034242 | 0.04849889 |
| ENSG00000018510 | <i>DNAJB5-AS1</i>     | alkylglycerone phosphate synthase                     | 1.52087463 | 0.04879267 |
| ENSG00000157827 | <i>FMNL2</i>          | formin-like 2 [18267]                                 | 1.52906358 | 0.0344828  |
| ENSG00000108932 | <i>SLC16A6</i>        | solute carrier family 16, member 6                    | 1.55532917 | 0.03647016 |
| ENSG00000100523 | <i>DDHD1</i>          | DDHD domain containing 1                              | 1.55790743 | 0.03000496 |
| ENSG00000215548 | <i>LINC01224</i>      | FSHD region gene 1 family member J, pseudogene        | 1.56392389 | 0.04866068 |
| ENSG00000204837 | <i>BHLHE41</i>        |                                                       | 1.57435602 | 0.04641574 |
| ENSG00000261115 | <i>TMEM178B</i>       | transmembrane protein 178B                            | 1.6093989  | 0.02407209 |
| ENSG00000189057 | <i>FAM111B</i>        | family with sequence similarity 111, member B         | 1.64040874 | 0.02418023 |
| ENSG00000179242 | <i>RP11-204M4.2</i>   | cadherin 4, type 1, R-cadherin (retinal)              | 1.6566309  | 0.04641162 |
| ENSG00000261775 | <i>CH507-236L23.2</i> |                                                       | 1.65767634 | 0.04977134 |
| ENSG00000280330 | <i>CH507-338C24.2</i> |                                                       | 1.65767634 | 0.04977134 |
| ENSG00000279177 | <i>AC062028.1</i>     |                                                       | 1.65767634 | 0.04977134 |
| ENSG00000123095 | <i>RP11-539L10.2</i>  | basic helix-loop-helix family, member e41             | 1.69861877 | 0.04645286 |
| ENSG00000153132 | <i>CLGN</i>           | calmegin                                              | 1.70061329 | 0.01349185 |
| ENSG00000146409 | <i>SLC18B1</i>        | solute carrier family 18, subfamily B, member 1       | 1.71082183 | 0.03080595 |
| ENSG00000162694 | <i>CAMK1G</i>         | exostosin-like glycosyltransferase 2                  | 1.72256847 | 0.04767342 |
| ENSG00000154310 | <i>TNIK</i>           | TRAF2 and NCK interacting kinase                      | 1.72747256 | 0.01915633 |
| ENSG00000170558 | <i>CDH2</i>           | cadherin 2, type 1, N-cadherin (neuronal)             | 1.74292957 | 0.0242855  |
| ENSG00000139354 | <i>GAS2L3</i>         | growth arrest-specific 2 like 3                       | 1.75646319 | 0.0263216  |



|                 |                       |                                                                                               |            |            |
|-----------------|-----------------------|-----------------------------------------------------------------------------------------------|------------|------------|
| ENSG00000162878 | <i>PKDCC</i>          | protein kinase domain containing, cytoplasmic                                                 | 1.76751276 | 0.02698816 |
| ENSG00000164764 | <i>SBSPON</i>         | somatomedin B and thrombospondin, type 1 domain containing                                    | 1.7683902  | 0.03511089 |
| ENSG00000057252 | <i>SOAT1</i>          | sterol O-acyltransferase 1                                                                    | 1.78004216 | 0.02476    |
| ENSG00000106483 | <i>CYTL1</i>          | secreted frizzled-related protein 4                                                           | 1.78606984 | 0.04954055 |
| ENSG00000226751 | <i>DNASE2B</i>        |                                                                                               | 1.81861131 | 0.04912248 |
| ENSG00000057019 | <i>DCBLD2</i>         | discoidin, CUB and LCCL domain containing 2                                                   | 1.82368976 | 0.04270698 |
| ENSG00000280145 | <i>RP11-317P15.4</i>  |                                                                                               | 1.83139213 | 0.04749352 |
| ENSG00000168491 | <i>CCDC110</i>        | coiled-coil domain containing 110                                                             | 1.85044688 | 0.01741206 |
| ENSG00000131711 | <i>MAP1B</i>          | microtubule-associated protein 1B                                                             | 1.85251643 | 0.01232065 |
| ENSG00000189007 | <i>ADAT2</i>          | adenosine deaminase, tRNA-specific 2                                                          | 1.86044352 | 0.0354144  |
| ENSG00000108960 | <i>MMD</i>            | monocyte to macrophage differentiation-associated                                             | 1.87009619 | 0.01750723 |
| ENSG00000114455 | <i>HHLA2</i>          | HERV-H LTR-associating 2                                                                      | 1.87183289 | 0.01211896 |
| ENSG00000164649 | <i>RP11-411K7.1</i>   | cell division cycle associated 7-like                                                         | 1.87294508 | 0.04475613 |
| ENSG00000162520 | <i>SYNC</i>           | syncoilin, intermediate filament protein                                                      | 1.89119771 | 0.0250393  |
| ENSG00000253910 | <i>PCDHGB2</i>        | protocadherin gamma subfamily B, 2                                                            | 1.93251717 | 0.00864516 |
| ENSG00000176401 | <i>SIGLEC8</i>        | EP300 interacting inhibitor of differentiation 2B                                             | 1.93251717 | 0.04999554 |
| ENSG00000166130 | <i>IKBIP</i>          | IKBKB interacting protein                                                                     | 1.93455736 | 0.03767763 |
| ENSG00000183722 | <i>LHFP</i>           | lipoma HMGIC fusion partner                                                                   | 1.941342   | 0.02029464 |
| ENSG00000188060 | <i>RAB42</i>          | RAB42, member RAS oncogene family                                                             | 1.97288638 | 0.02559835 |
| ENSG00000279312 | <i>CH507-154B10.1</i> |                                                                                               | 1.98085801 | 0.04738529 |
| ENSG00000135919 | <i>SERPINE2</i>       | serpin peptidase inhibitor, clade E (nexin, plasminogen activator inhibitor type 1), member 2 | 2.00924912 | 0.02550524 |
| ENSG00000260837 | <i>SHOX2</i>          |                                                                                               | 2.04514306 | 0.04979501 |
| ENSG00000168779 | <i>AC011718.2</i>     | short stature homeobox 2                                                                      | 2.04514306 | 0.04979501 |
| ENSG00000272788 | <i>PCDH1</i>          |                                                                                               | 2.10127695 | 0.04885545 |
| ENSG00000275318 | <i>SH2D1B</i>         |                                                                                               | 2.10127695 | 0.04926852 |
| ENSG00000143469 | <i>SYT14</i>          | synaptotagmin XIV                                                                             | 2.11666541 | 0.02834196 |
| ENSG00000198796 | <i>ALPK2</i>          | alpha-kinase 2                                                                                | 2.14609936 | 0.02160741 |
| ENSG00000274776 | <i>OR2A4</i>          |                                                                                               | 2.16564711 | 0.04695039 |

|                 |                       |                                                                                  |            |            |
|-----------------|-----------------------|----------------------------------------------------------------------------------|------------|------------|
| ENSG00000156886 | <i>RP11-526D8.11</i>  | integrin, alpha D                                                                | 2.28847471 | 0.04921033 |
| ENSG00000240694 | <i>PNMA2</i>          | paraneoplastic Ma antigen 2                                                      | 2.31943911 | 0.02067334 |
| ENSG00000180658 | <i>RP11-111F5.4</i>   | olfactory receptor, family 2, subfamily A, member 4                              | 2.32266201 | 0.04697349 |
| ENSG00000197769 | <i>MAP1LC3C</i>       | microtubule-associated protein 1 light chain 3 gamma                             | 2.33075048 | 0.00382904 |
| ENSG00000109099 | <i>PMP22</i>          | peripheral myelin protein 22                                                     | 2.33952201 | 0.00434329 |
| ENSG00000162692 | <i>VCAM1</i>          | vascular cell adhesion molecule 1                                                | 2.35494248 | 0.02198844 |
| ENSG00000146070 | <i>PLA2G7</i>         | phospholipase A2, group VII (platelet-activating factor acetylhydrolase, plasma) | 2.40751244 | 0.03509484 |
| ENSG00000120457 | <i>KCNJ5</i>          | potassium channel, inwardly rectifying subfamily J, member 5                     | 2.41196055 | 0.02629045 |
| ENSG00000170891 | <i>LINC01010</i>      | cytokine-like 1                                                                  | 2.43016017 | 0.04961189 |
| ENSG00000274044 | <i>RPS16</i>          |                                                                                  | 2.51158596 | 0.0498035  |
| ENSG00000137976 | <i>CNTN5</i>          | deoxyribonuclease II beta                                                        | 2.56199743 | 0.04912422 |
| ENSG00000143387 | <i>CTSK</i>           | cathepsin K                                                                      | 2.65689924 | 0.02031711 |
| ENSG00000159674 | <i>SPON2</i>          | spondin 2, extracellular matrix protein                                          | 2.65890622 | 0.01281521 |
| ENSG00000109738 | <i>RP11-1036E20.9</i> | glycine receptor, beta                                                           | 2.66322046 | 0.04719797 |
| ENSG00000122254 | <i>HS3ST2</i>         | heparan sulfate (glucosamine) 3-O-sulfotransferase 2                             | 2.68914533 | 0.00578757 |
| ENSG00000113249 | <i>HAVCR1</i>         | hepatitis A virus cellular receptor 1                                            | 2.72888146 | 0.02351189 |
| ENSG00000136235 | <i>GPNMB</i>          | glycoprotein (transmembrane) nmb                                                 | 2.93831779 | 0.01096223 |
| ENSG00000236700 | <i>DDX43</i>          | long intergenic non-protein coding RNA 1010                                      | 3.04690012 | 0.04963814 |
| ENSG00000158270 | <i>COLEC12</i>        | collectin sub-family member 12                                                   | 3.09694574 | 0.0128705  |
| ENSG00000107593 | <i>PKD2L1</i>         | polycystic kidney disease 2-like 1                                               | 3.14517114 | 0.00371346 |
| ENSG00000113361 | <i>CDH6</i>           | cadherin 6, type 2, K-cadherin (fetal kidney)                                    | 3.23217055 | 0.00565568 |
| ENSG00000130208 | <i>APOC1</i>          | apolipoprotein C-I                                                               | 3.51725819 | 0.03333679 |

## 2. Supplemental Figures

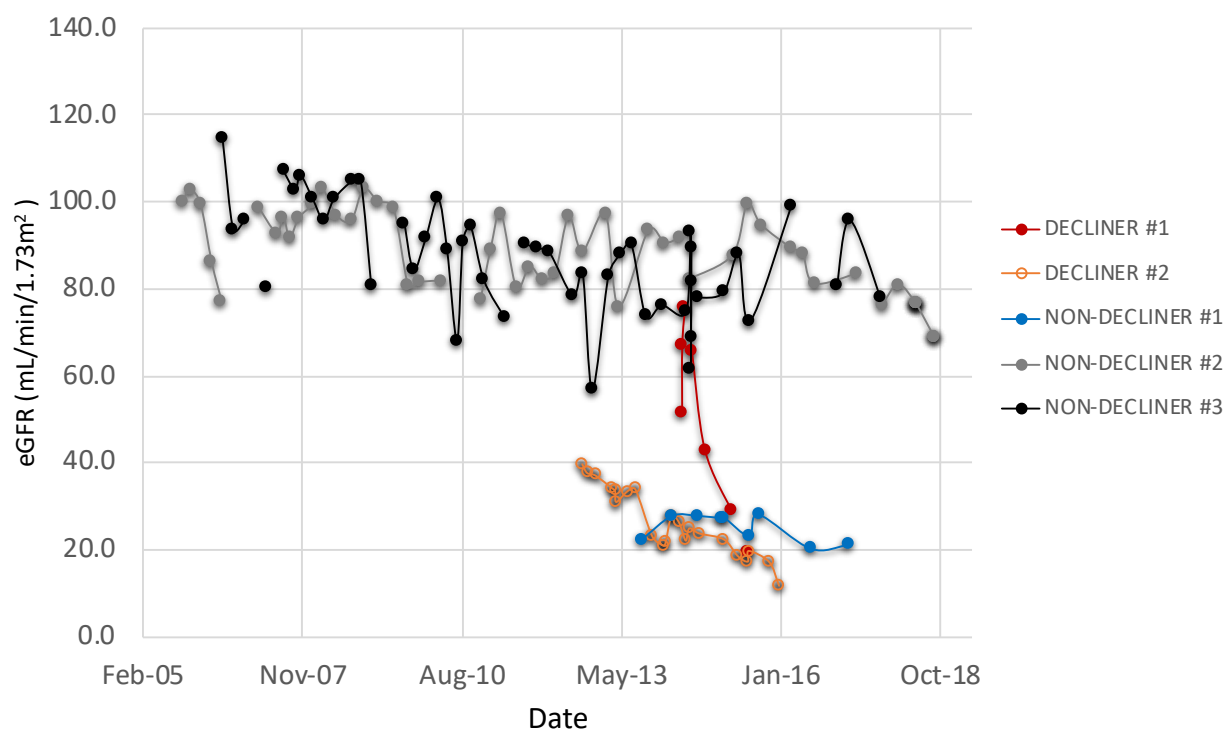

**Supplemental Figure 1.** Estimated glomerular filtration rate (eGFR) evolution of the type 1 diabetes patients selected for the transcriptomics study.

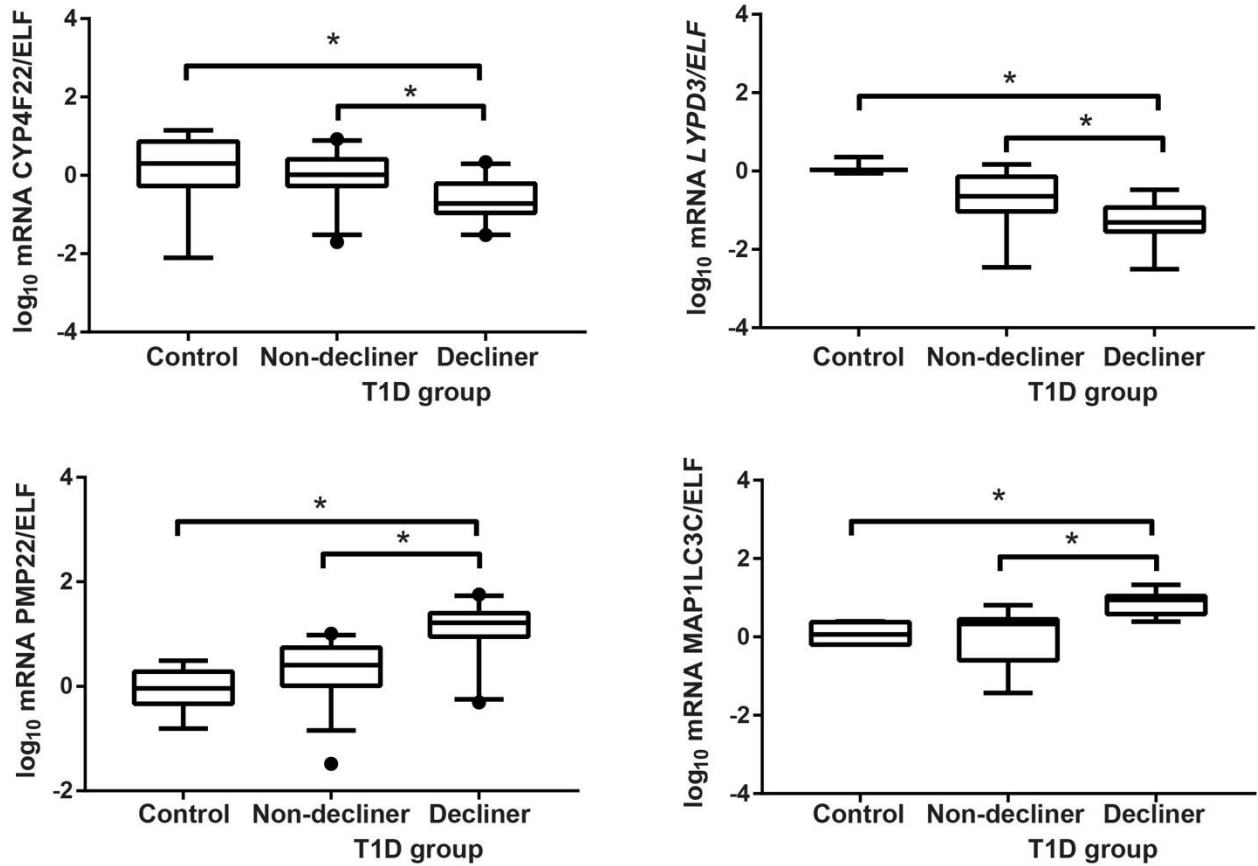

**Supplemental Figure 2. Four genes differentially expressed in non-diabetic controls and type 1 diabetes (T1D) patients classified as non-decliners or decliners.** Cross-sectional validation of genes differentially expressed in the human urinary sediment cells from non-diabetic controls and T1D patients classified as non-decliners or decliners (eGFR  $<$  or  $\geq 3.5$  mL/min/1.73m<sup>2</sup> per year of follow up, respectively). The horizontal lines within boxplots represent 5-95 percentile. \* $P < 0.05$

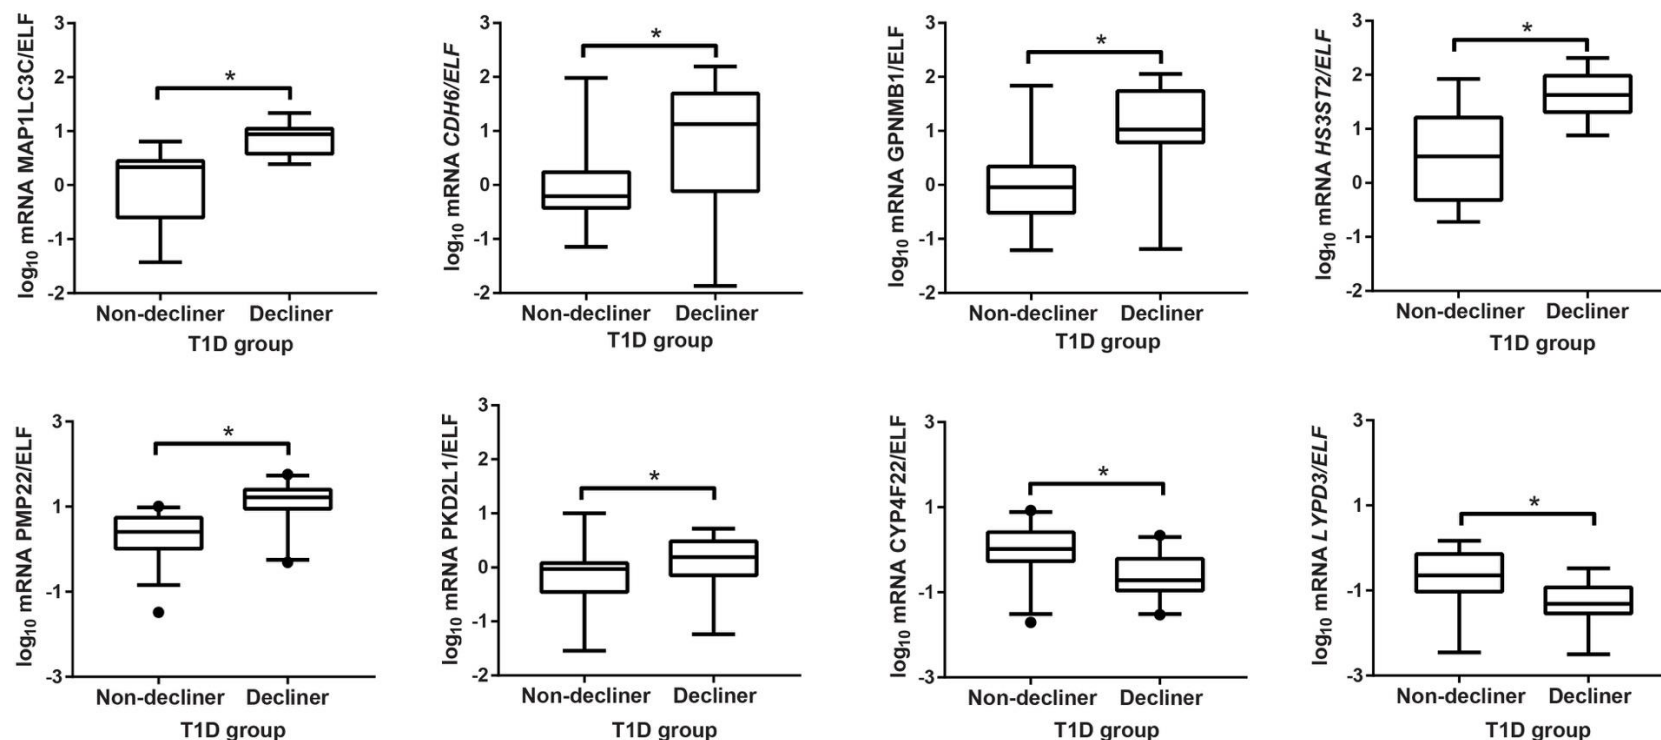

**Supplemental Figure 3. Eight genes differentially expressed between type 1 diabetes (T1D) patients classified as non-decliners or decliners without adjustment for possible confounders.** Cross-sectional validation of genes differentially expressed in the human urinary sediment cells from T1D patients classified as non-decliners or decliners (eGFR < or ≥3.5mL/min/1.73m<sup>2</sup> per year of follow up, respectively). The horizontal lines within boxplots represent 5-95 percentile. \*P< 0.05
